# Supplementary material for: Different drug loading methods and antibiotic structure modulate the efficacy of polydopamine nanoparticles as drug nanocarriers
Source: Royal Society of Chemistry journal article supplement (doi:10.1039/d3tb01490h), 2023-01-01
Supplement: d3tb01490h1.pdf [file d3tb01490h1.pdf]

## Electronic Supplementary Information (ESI)

# Different drug loading method and antibiotic structure modulate the efficacy of polydopamine nanoparticles as drug nanocarriers

Meera Patel,<sup>a,b</sup> Nesha May O. Andoy,<sup>a</sup> Susannah Megan Tran,<sup>a</sup> Keuna Jeon<sup>a,b</sup> and Ruby May A. Sullan<sup>\*a,b</sup>

<sup>a</sup>Department of Physical and Environmental Sciences, University of Toronto Scarborough, 1265 Military Trail, Toronto, Ontario, Canada, M1C 1A4.

<sup>b</sup>Department of Chemistry, University of Toronto, 80 St. George St., Toronto, Ontario, Canada, M5S 3H6.

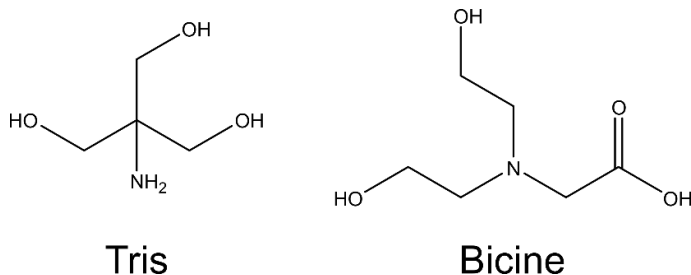

**Figure S1 Structures of Tris and Bicine.** Tris has an amine ( $-\text{NH}_2$ ) group that can covalently react with the growing dopamine polymer, whereas Bicine does not have that amine group present.

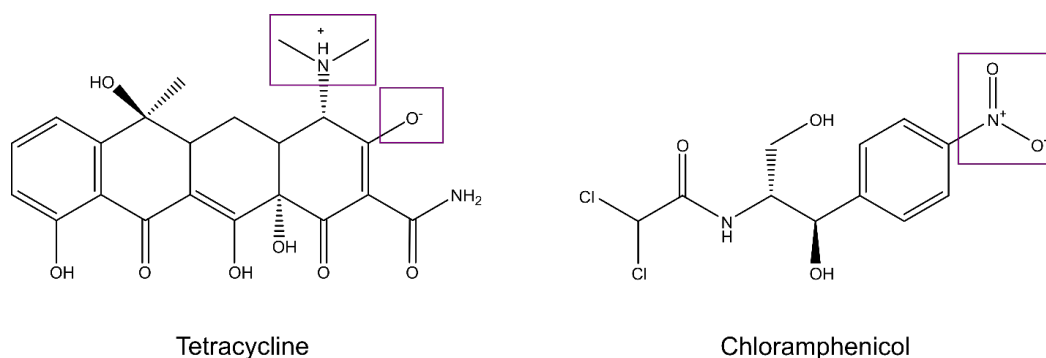

**Figure S2 Zwitterionic structures of Tetracycline (Tet) and Chloramphenicol (Chl) at pH 7.**

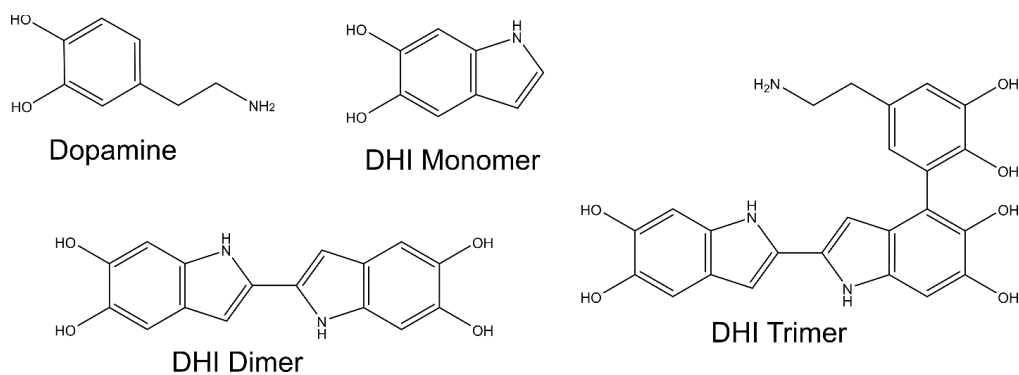

**Figure S3 Structures of dopamine, 5,6-dihydroxyindole (DHI) monomer, DHI dimer, and DHI trimer.** These oligomeric structures of dopamine are proposed to be formed during the initial stages of polydopamine nanoparticle (PDNP) formation.

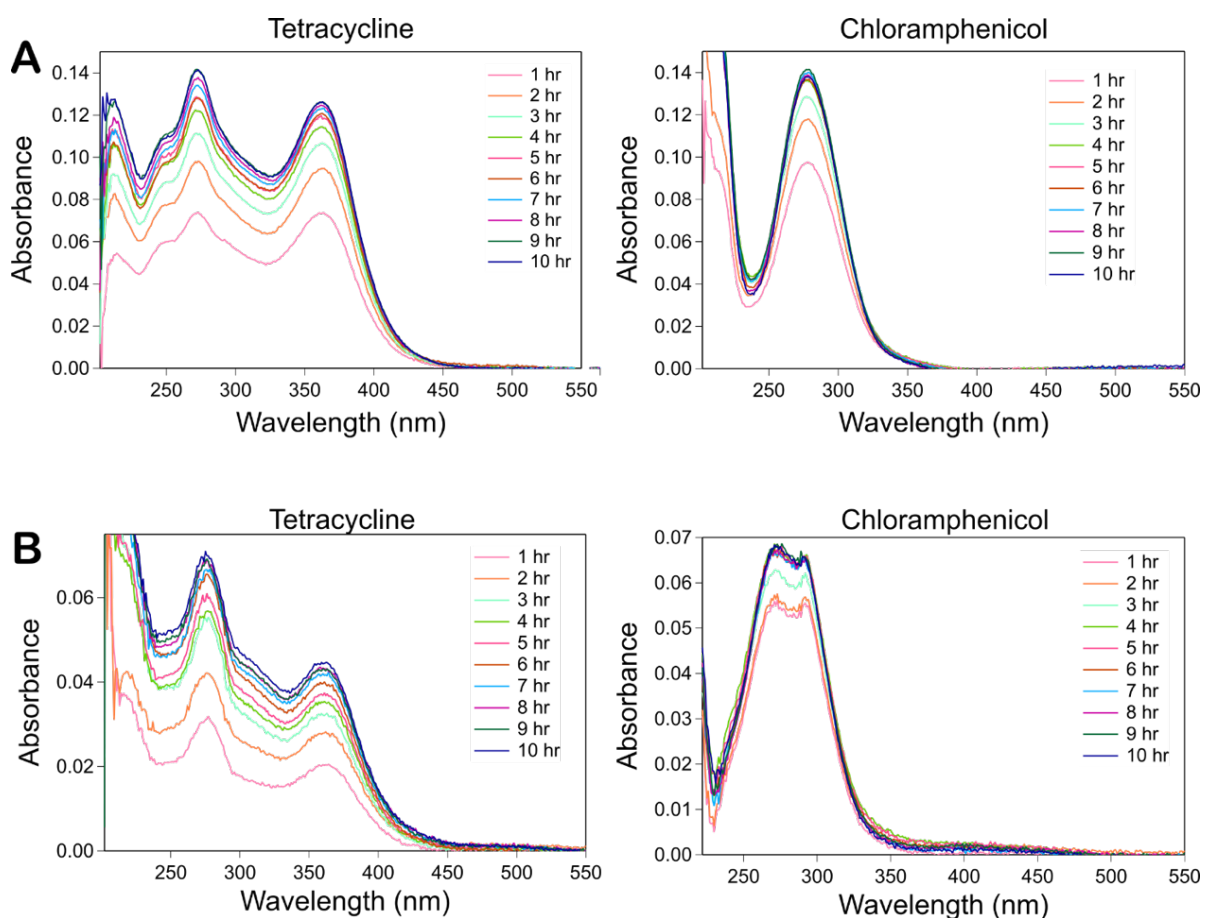

**Figure S4 Absorbance spectra for passive drug release for drugs loaded (A) after and (B) during PDNP synthesis for 10 hours.** The background absorption for PDNP oxidation by-products has been corrected for.

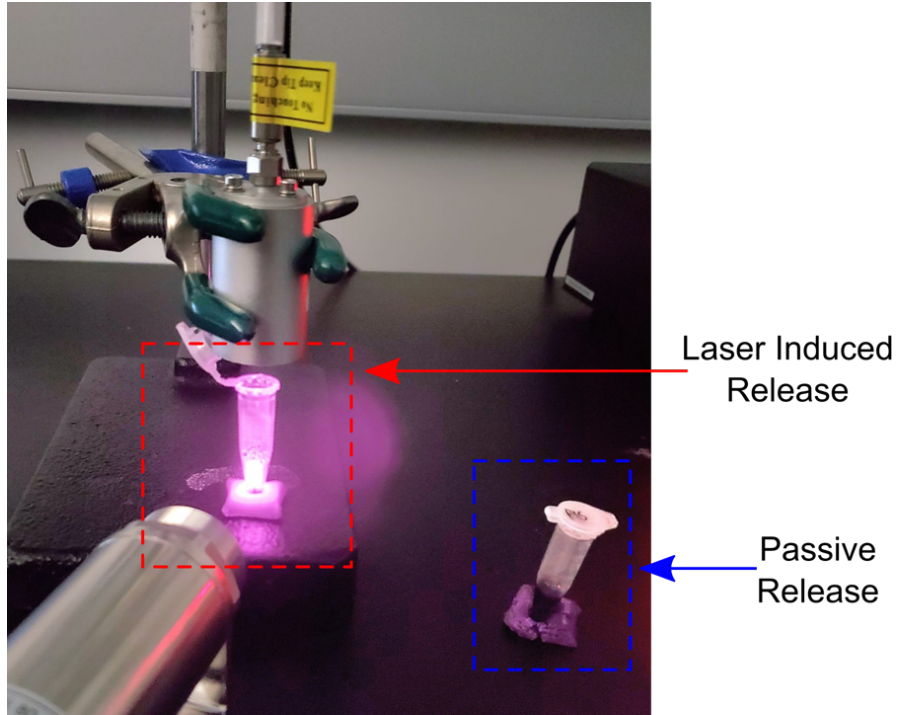

Figure S5 Experimental set-up for laser-induced (441 mW, 808 nm) vs passive drug release for both drugs loaded post- and in- PDNP synthesis.

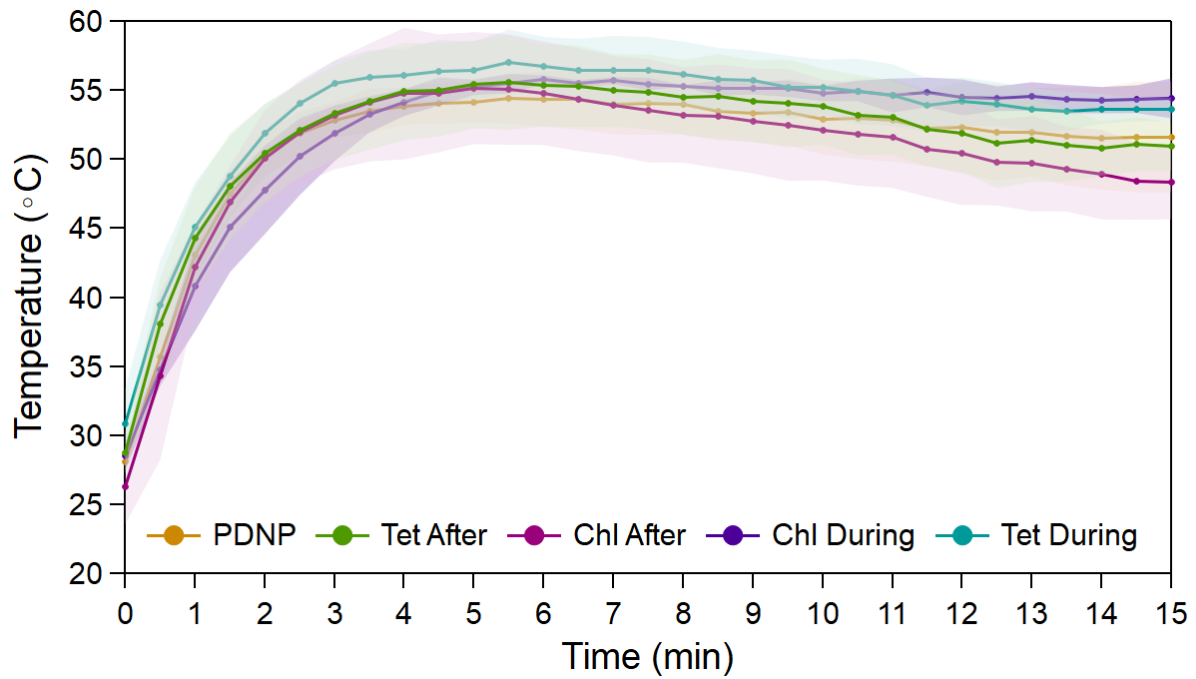

Figure S6 Temperature of PDNP increases upon laser irradiation due to photothermal effect.

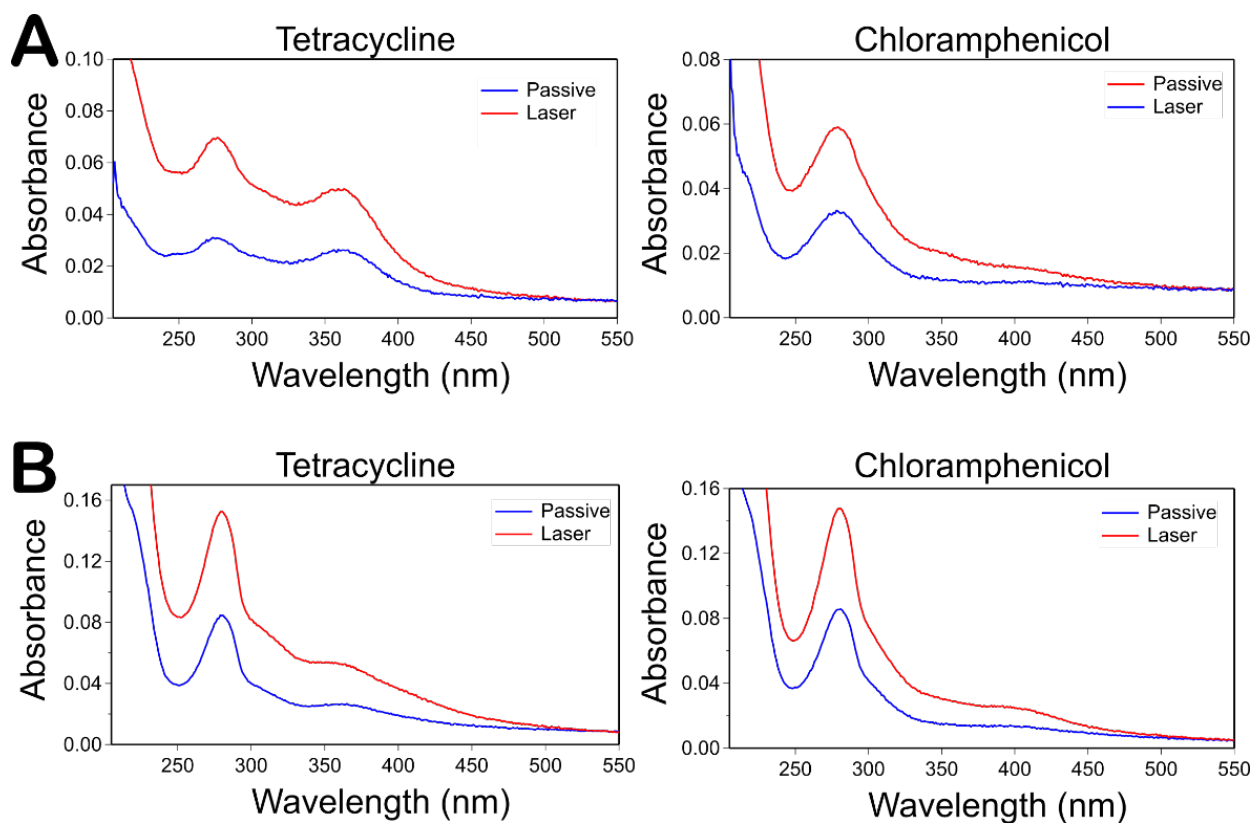

**Figure S7 Absorbance spectra for passive vs laser-induced drug release for drug loaded (A) post- and (B) in- PDNP synthesis after 15 minutes.** The background absorption for PDNP oxidation by-products has not been corrected for. Laser-induced drug release (441 mW, 808 nm; red) is higher than passive drug release (blue).

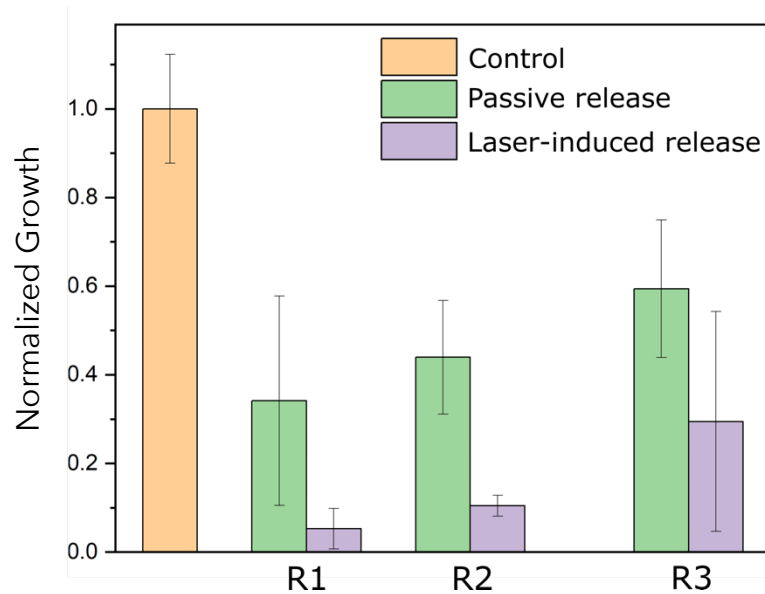

**Figure S8 Laser-induced drug release from hydrogels with Chloramphenicol-loaded PDNP.** Growth of *E. coli* in LB-media (control) and in media exposed to hydrogel without (passive release) and with laser treatment (laser-induced release). Hydrogels ( $n = 3$ ) were treated with laser for 10 min (R1) and repeated two times with fresh LB media (R2 and R3).

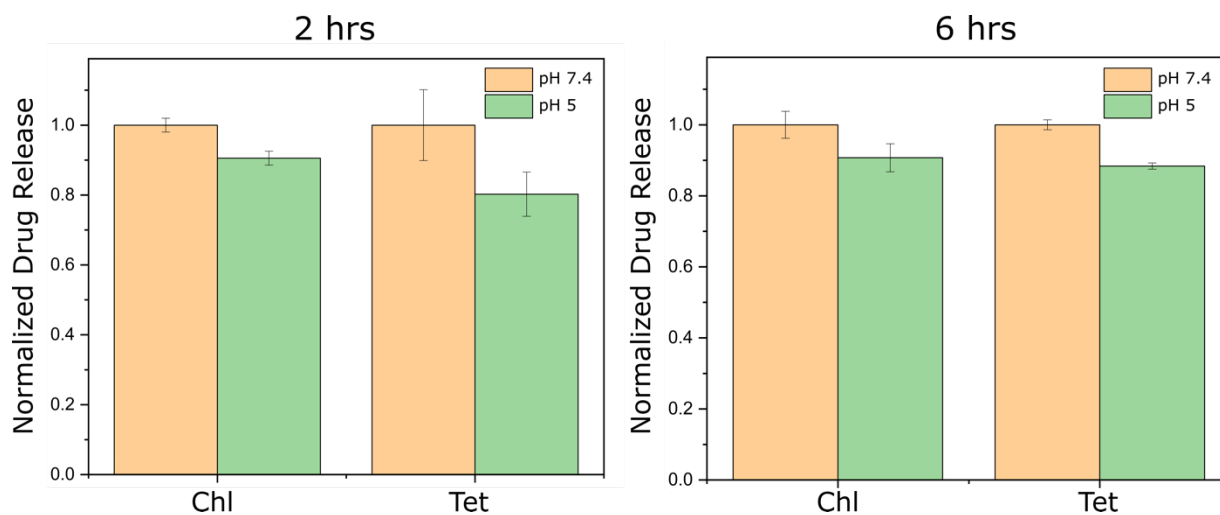

**Figure S9 pH-dependent drug release.** The amount of drug release at lower pH (pH 5) is lower than at higher pH (pH 7.5), for both Chloramphenicol (Chl) and Tetracycline (Tet),  $n = 4$  for each drug and each pH.
